# Supplementary material
Source: PubMed Central journal article supplement (PMC3518458)
Supplement: supp_139.24.4623_DEV086645.pdf [file supp_139.24.4623_DEV086645.pdf]

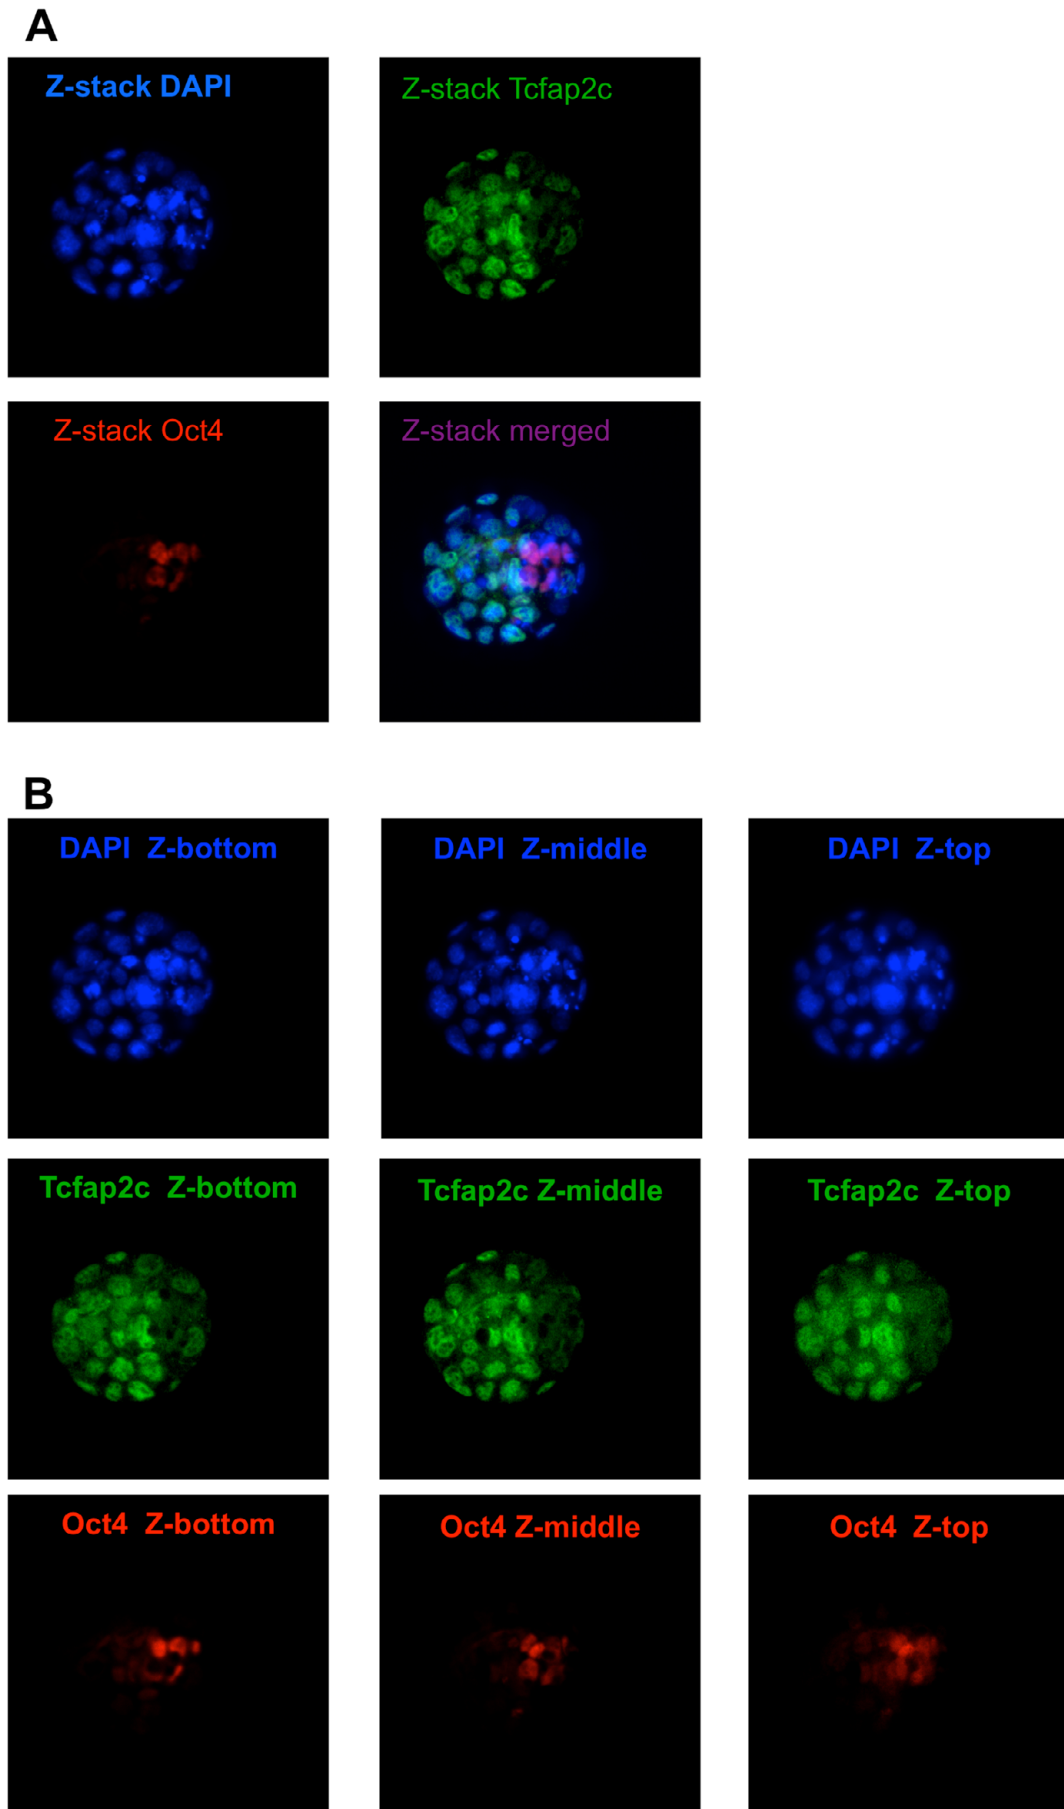

**Fig. S1. Heterogeneous localization of Tcfap2c protein in mouse blastocysts.** (A) Combined z-stack showing the localization of Tcfap2c in the mural TE. Tcfap2c is absent in the Oct4-positive ICM and surrounding polar TE. (B) Individual optical sections of a blastocyst stained for Tcfap2c, Oct4 and with DAPI.

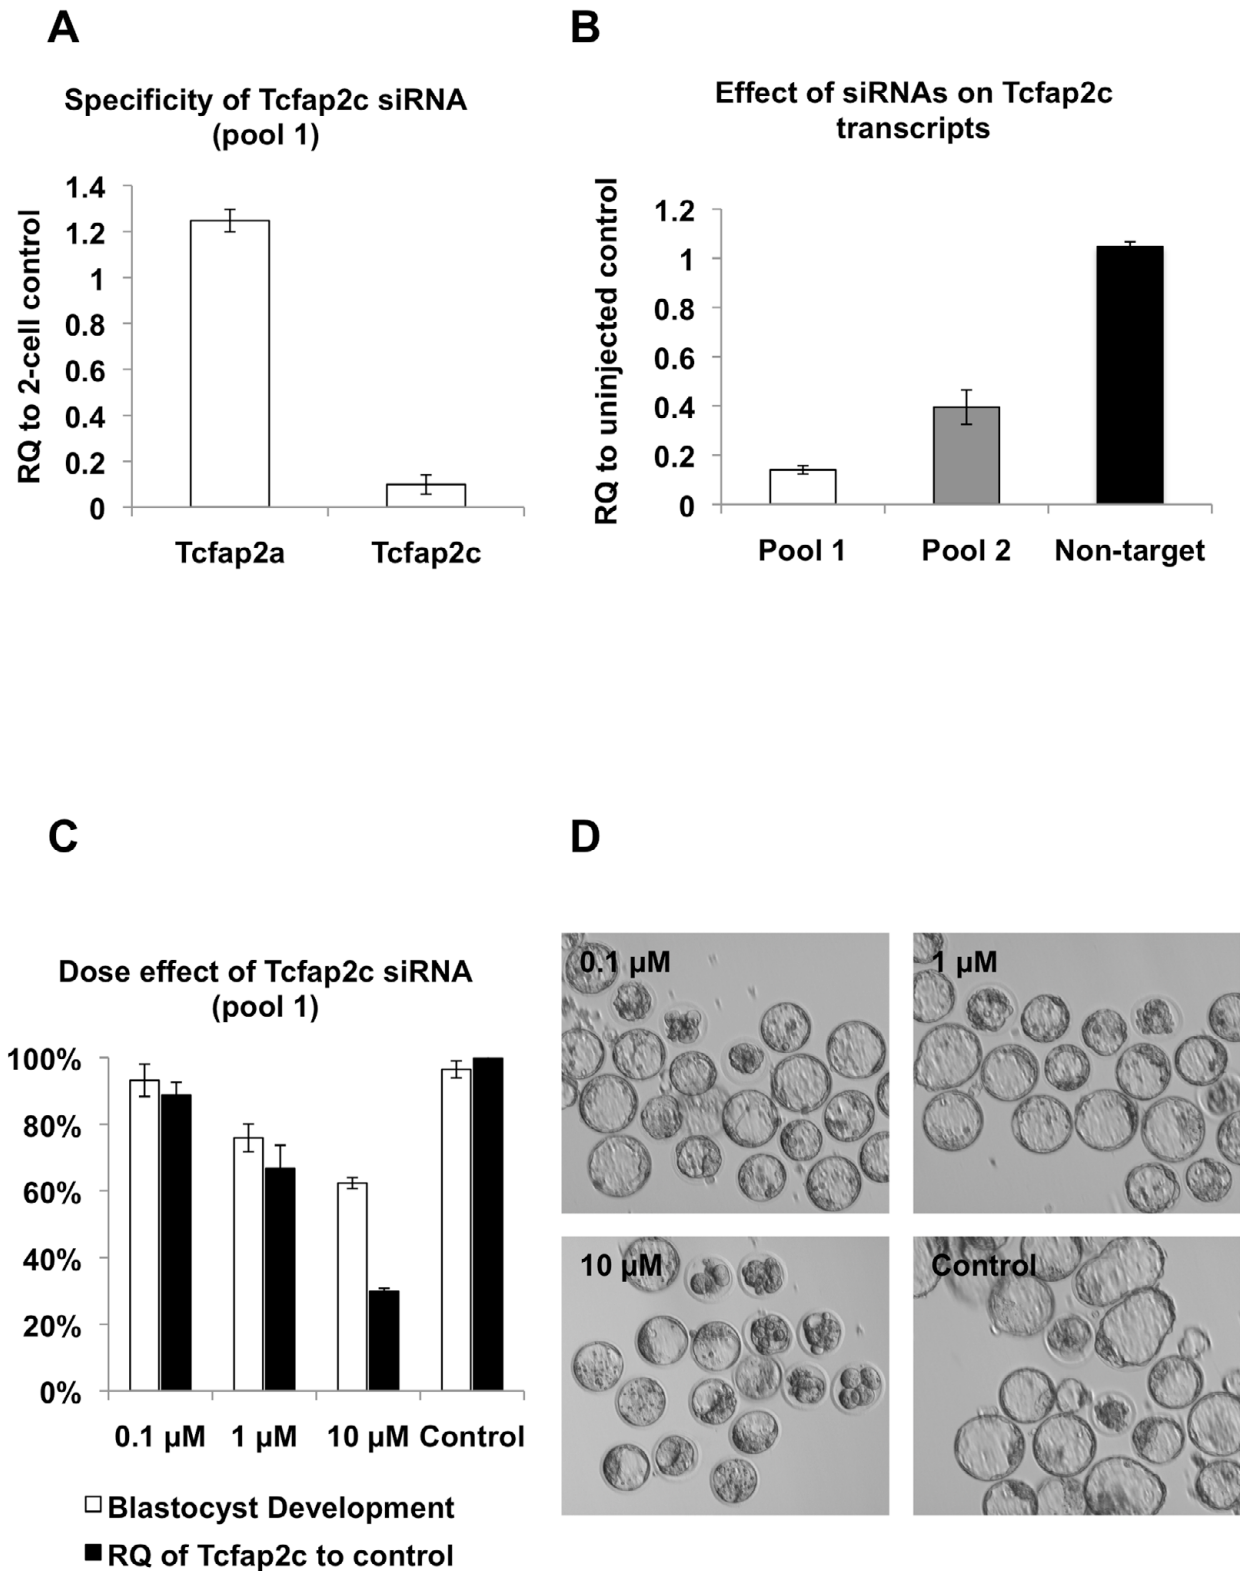

**Fig. S2. Control experiments demonstrating specificity of siRNA.** (A) qRT-PCR analysis of *Tcfap2a* and *Tcfap2c* transcripts in two-cell embryos microinjected with 100  $\mu\text{M}$  *Tcfap2c* siRNA. (B) qRT-PCR analysis of *Tcfap2c* transcripts in embryos injected with non-targeting siRNA, *Tcfap2c* siRNA (pool 1), or *Tcfap2c* siRNA (pool 2). Expression is relative to control uninjected embryos. (C) Effect of different concentrations of *Tcfap2c* siRNA on *Tcfap2c* transcripts and blastocyst formation. (D) Brightfield images of embryos injected with different concentrations of *Tcfap2c* siRNA at 120 hph. Error bars represent mean  $\pm$  s.e.m.

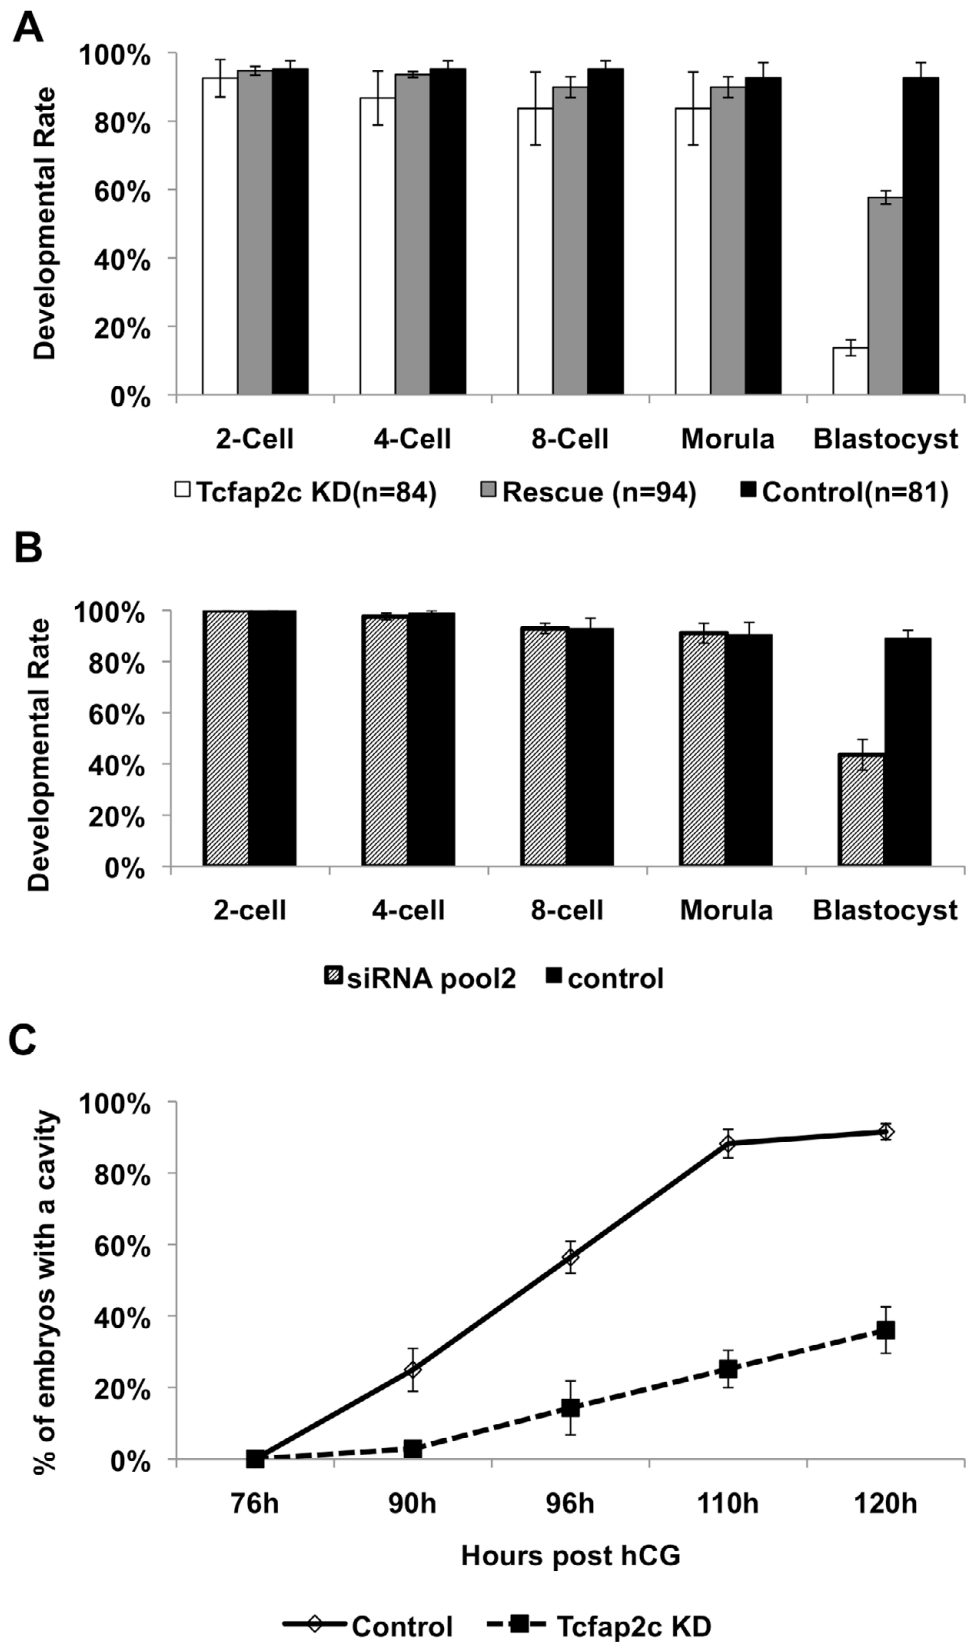

**Fig. S3. siRNA-mediated knockdown of *Tcfap2c* in mouse preimplantation embryos.** (A) Effect of *Tcfap2c* siRNA on mouse preimplantation development (*Tcfap2c* siRNA pool 1). A second set of embryos was co-injected with both *Tcfap2c* siRNA (pool 1) and *Tcfap2c* mRNA (rescue). (B) Developmental rates of preimplantation embryos injected with a second pool of *Tcfap2c* siRNA. (C) Timing of cavity formation in *Tcfap2c* KD embryos (*Tcfap2c* siRNA pool 1). Error bars represent mean  $\pm$  s.e.m.

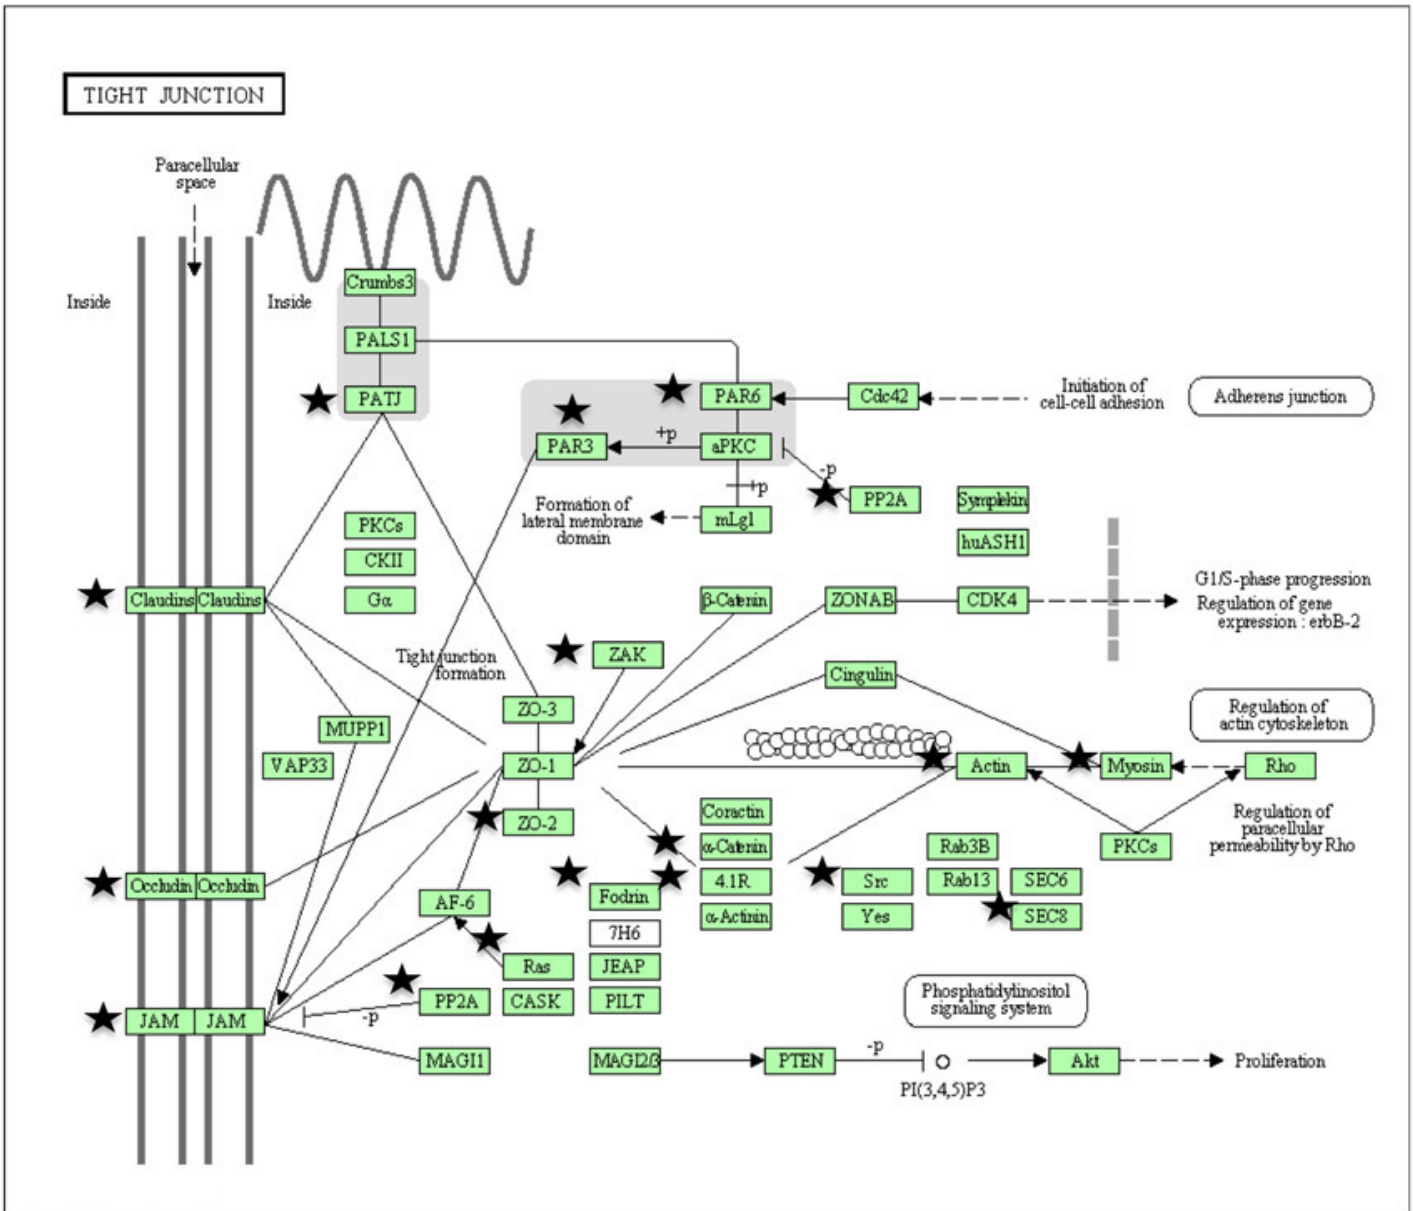

**Fig. S4. Tight junction pathway map.** Tcfap2c target genes are found in TJ and paracellular sealing pathways. Genes selected using the DAVID pathway analysis tool are marked with a star. Pathway map 04530 is adapted with permission from the KEGG database ([http://www.genome.jp/kegg-bin/show\\_pathway?map04530](http://www.genome.jp/kegg-bin/show_pathway?map04530)).

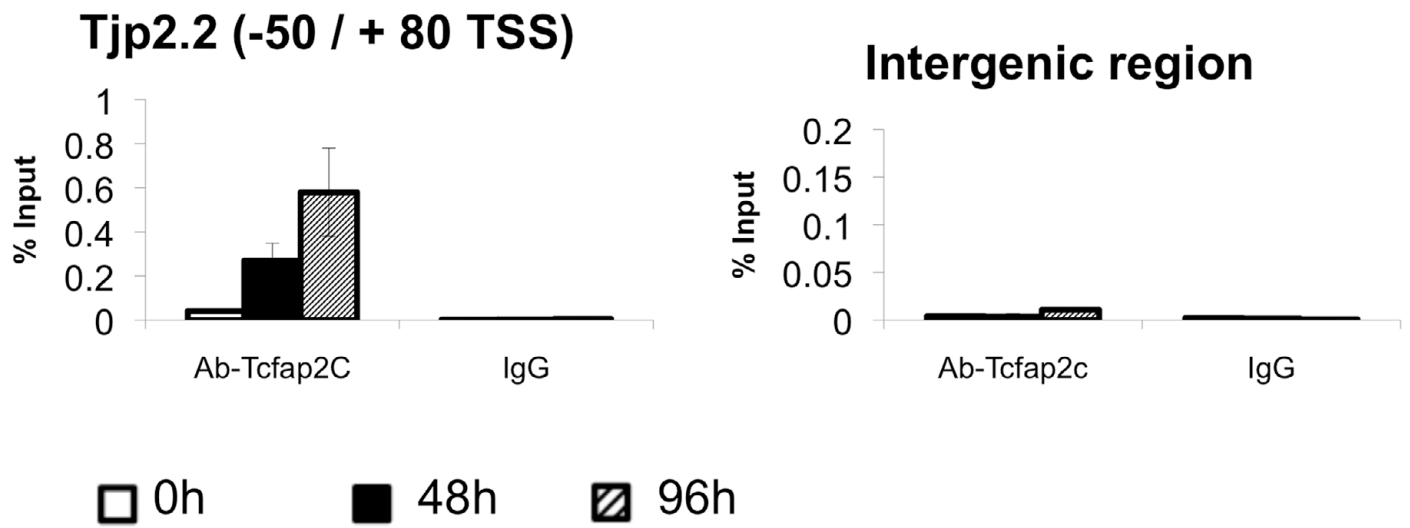

**Fig. S5. ChIP analysis of Tcfap2c-bound genes.** The promoter regions of *Tjp2* variant 2 and *Fnl1* were occupied by Tcfap2c in Cdx2-inducible ES cells, but enrichment was not observed at an intergenic region (negative control). Error bars represent mean  $\pm$  s.e.m.

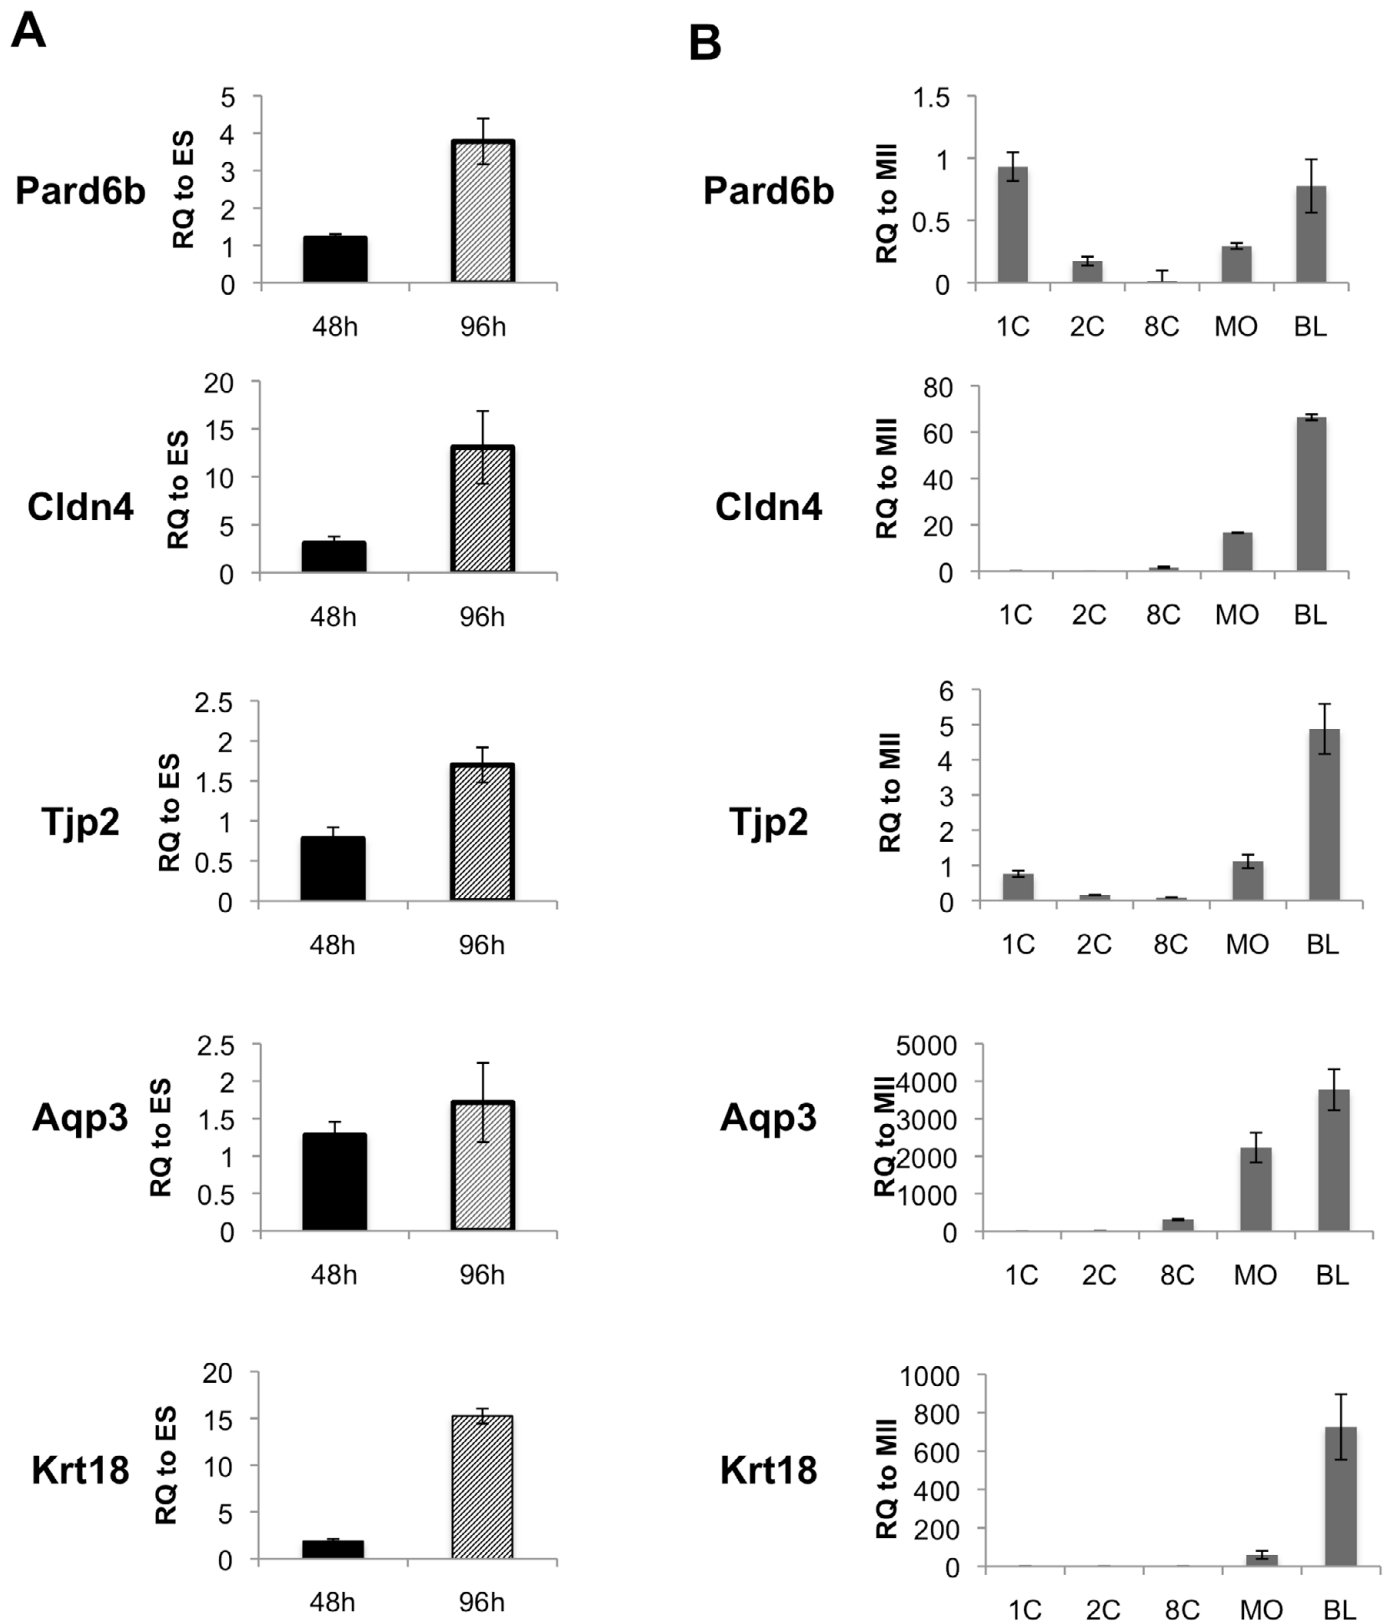

**Fig. S6. Tcfap2c target genes are upregulated during ES cell differentiation into TE-like cells and during blastocyst formation.** (A) Real-time RT-PCR analysis of Tcfap2c target genes in Cdx2-inducible ES cells at 0, 48 and 96 hours post-induction. Key blastocyst formation genes are upregulated during ES cell differentiation into TE-like cells. (B) Real-time RT-PCR analysis of *Pard6b*, *Tjp2*, *Cldn4*, *Aqp3* and *Krt18* transcripts in one-cell, two-cell, four-cell, eight-cell, morula, and blastocyst stage embryos. Error bars represent mean  $\pm$  s.e.m.

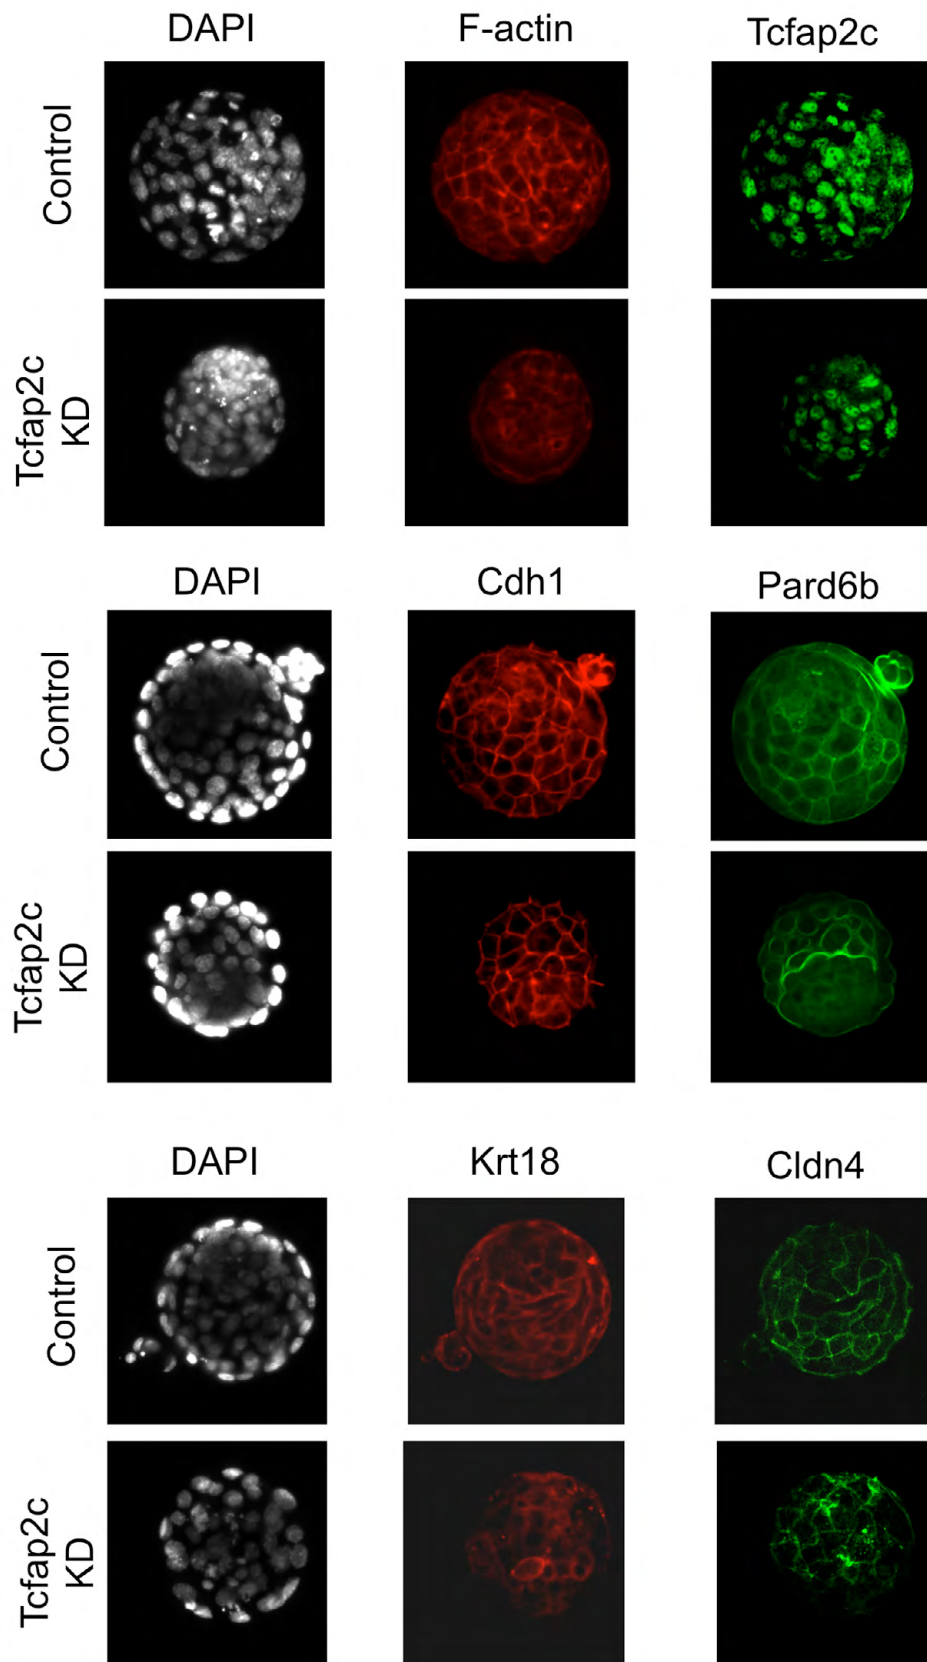

**Fig. S7. Expression and subcellular localization of Pard6b, Cldn4 and Krt18 are disrupted in Tcfap2c KD blastocysts.** Tcfap2c KD embryos that developed into blastocysts were stained for Tcfap2c, Pard6b, Cdh1, Cldn4, Krt18 and F-actin. Embryos were counterstained with DAPI.

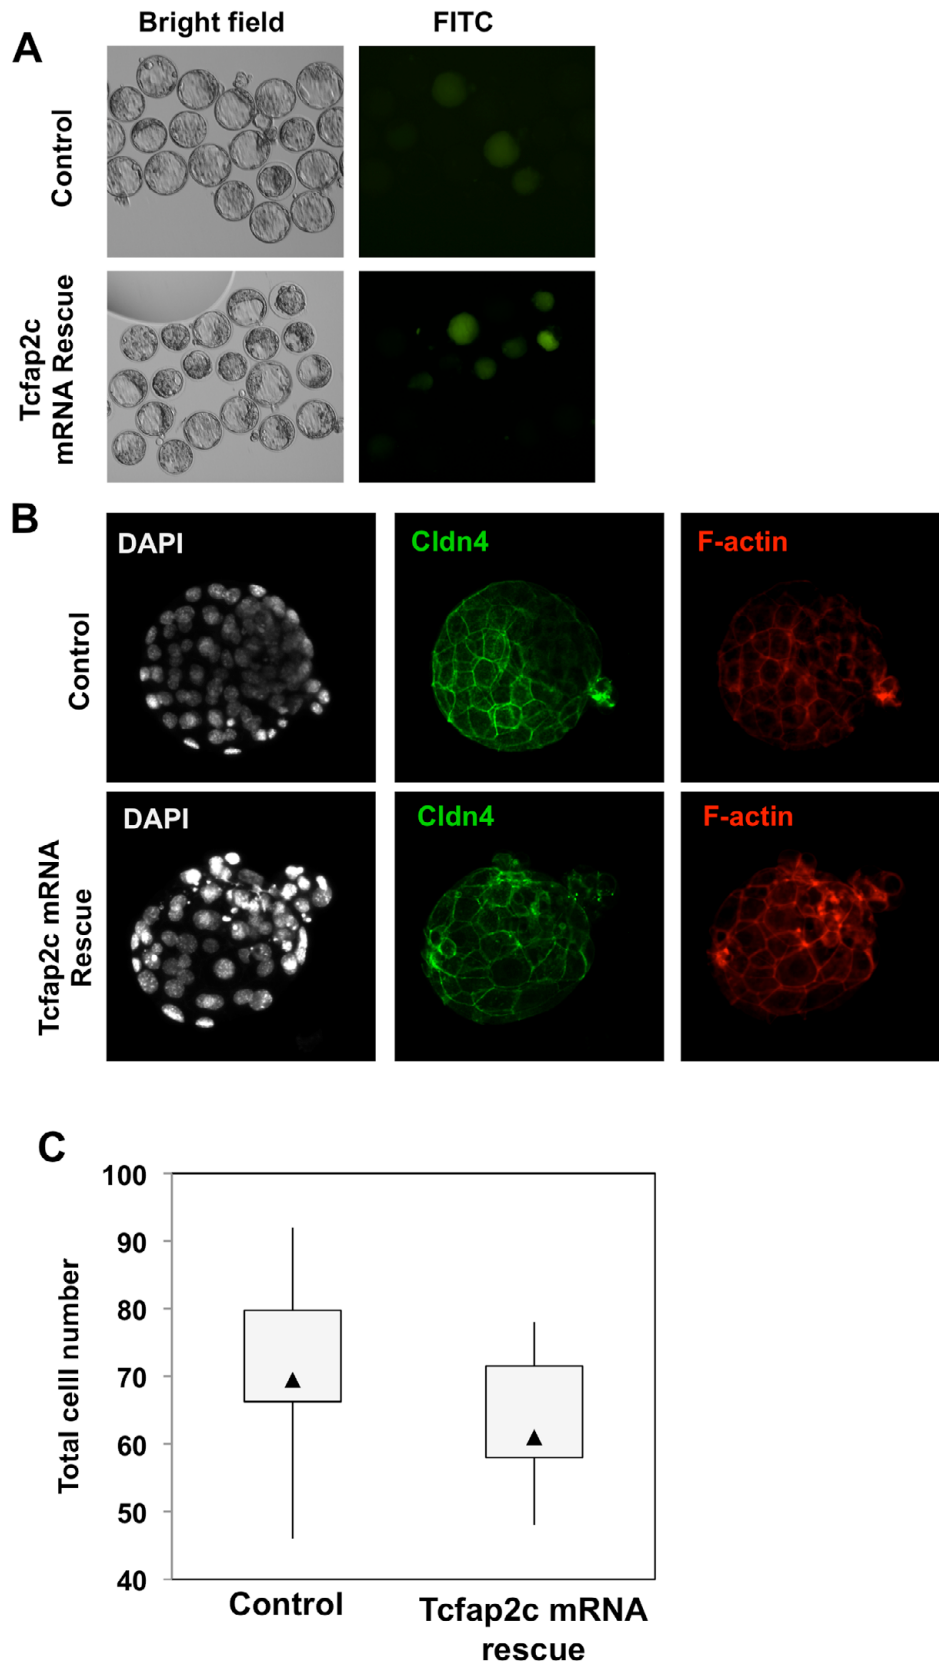

**Fig. S8. Injection of *Tcfap2c* mRNA into *Tcfap2c* KD embryos restored paracellular sealing and TJ assembly.** *Tcfap2c* mRNA-rescued blastocysts were subjected to an FITC-dextran assay and stained for TJ and cytoskeleton proteins. **(A)** Brightfield and FITC images of control and rescued blastocysts. **(B)** ICC analysis of Cldn4 and F-actin in control and rescued blastocysts. Embryos were counterstained with DAPI. **(C)** Box plot analysis of total cell numbers in *Tcfap2c* mRNA-rescued and control blastocysts. Small triangle denotes median; bars represent maximum and minimum.



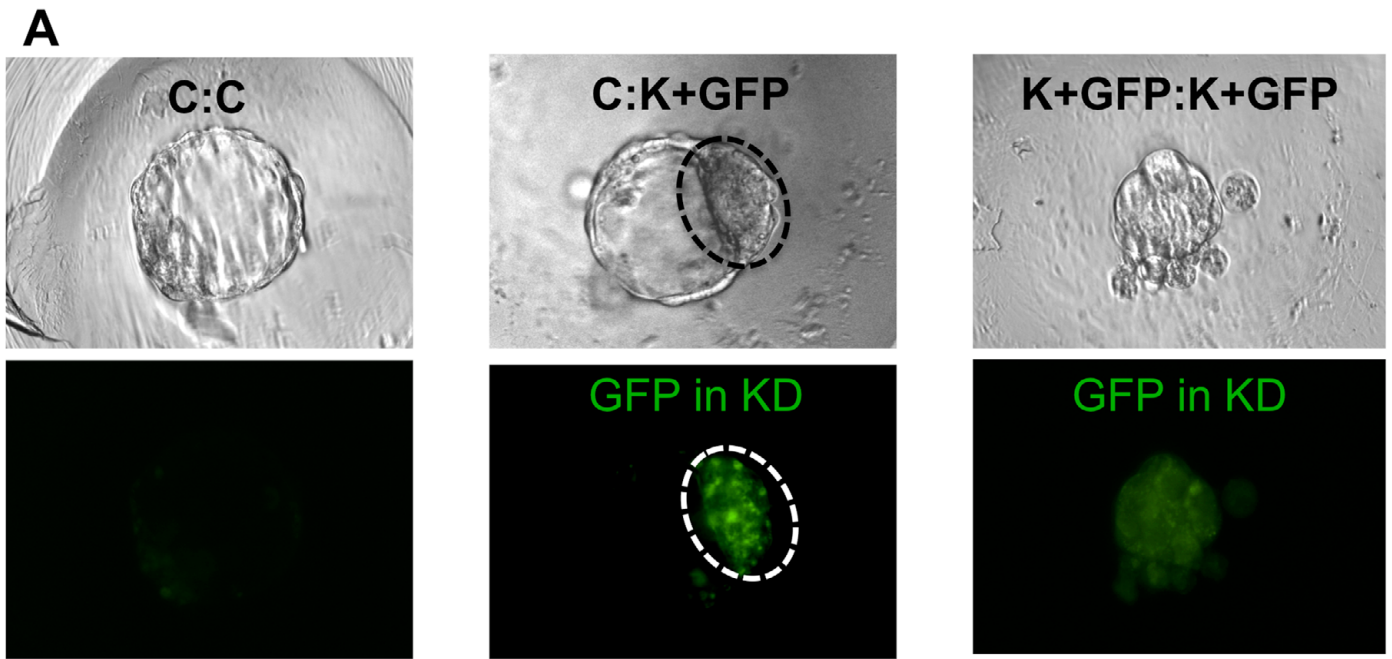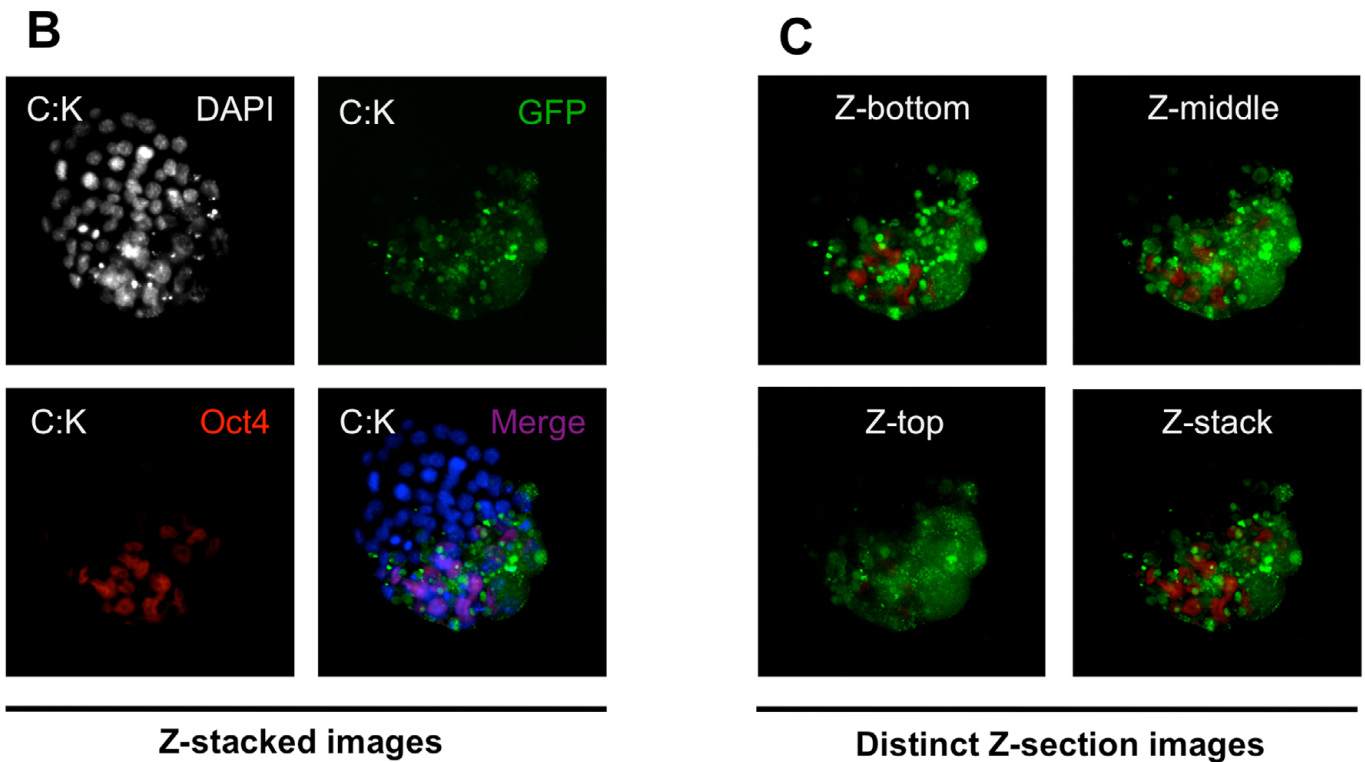

**Fig. S9. Tcfap2c KD blastomeres allocate to the ICM in chimeras.** GFP<sup>+</sup>/Tcfap2c KD eight-cell embryos were aggregated with control eight-cell embryos (C:K) and cultured to the blastocyst stage. (A) GFP<sup>+</sup>/Tcfap2c KD blastomeres contribute to the ICM. Dashed oval denotes GFP<sup>+</sup> ICM. (B) Combined z-stack showing the localization of GFP (Tcfap2c KD cells) and Oct4 in the ICM. Embryos were counterstained with DAPI. (C) Individual optical sections showing the colocalization of GFP (Tcfap2c KD cells) and Oct4 in the ICM of C:K blastocysts.

**Table S1. Primer sequences**

| Gene                              | Forward                     | Reverse                  |
|-----------------------------------|-----------------------------|--------------------------|
| <i>Cdh1</i>                       | TCCTTGTTTCGGCTATGTGTC       | GGCATGCACCTAAGAATCAG     |
| beta-catenin                      | GTTCGCCTTCATTATGGACTGCC     | ATAGCACCTGTGCCCGCAAAG    |
| <i>Pard6b</i>                     | ATGATGACAACTACCACAAGGCGG    | GGACGAGCCGAGATATGAAGATGC |
| <i>Pard3</i>                      | GAGACTCTACGGAGGTCCATGT      | TCGGTCATCCAGTTCTGTCTCG   |
| <i>Inadl</i>                      | CAGCAAGTATGCCTTGGTCT        | GTGGTCTAGGGTTTCCACCT     |
| <i>Cldn4</i>                      | CGCTACTCTTGCCATTACG         | ACTCAGCACACCATGACTTG     |
| <i>Cldn6</i>                      | CATTACATGGCCTGCTATTC        | CACATAATTCTTGGTGGGATATT  |
| <i>Cldn7</i>                      | AGGGTCTGCTCTGGTCCTT         | GTACGCAGCTTTGCTTTCA      |
| <i>Ocln</i>                       | ACGTCGTGGACCGGTATC          | AAAAACAGTGGTGGGGAAC      |
| <i>F11r</i>                       | ACTGGGATTCTCCTGGATTC        | CCACCAAAGAGCCAAGACTA     |
| <i>Jam2</i>                       | TGAGGCAGCTCTAGCAGTTT        | CTGTGTTTCTAGCTCCTCCAGT   |
| <i>Tjp1</i>                       | TTTGGGCTGTGCATCTGA          | TGCTTTATTGCTGCAGAGG      |
| <i>Tjp2</i>                       | CCCCGAGGAGGAGGAGTA          | GGGTCCCCACCGTATCTC       |
| <i>Atp1b3</i>                     | CTGCACTCTTCACATTCACA        | CACAGAATATGGCTTTAGGA     |
| <i>Aqp3</i>                       | GTGGCTCAGGTGGTGCTCAG        | CACATTGCGAAGGTCACAGCG    |
| <i>Aqp9</i>                       | GAAGGACCGAGCCAAGAAGAAC      | AGCAATAGAGCCACATCCAAGG   |
| <i>Krt18</i>                      | GGGTCCTTCTGCATCTGGAG        | GGCATCGTTGAGACTGAAATC    |
| <i>Fn1</i>                        | TGTAGGAGAACAGTGGCAGAAA      | CAGGTCTACGGCAGTTGTCA     |
| <i>Rock2</i>                      | GGTACCTGTACATGGTGATGGAGT    | TGCAAGCACTACTTCAGCAGTG   |
| <i>P21</i>                        | CCGTTGTCTCTTCGGTCCC         | CATGAGCGCATCGCAATC       |
| <i>P53</i>                        | GCGTAAACGCTTCGAGATGTT       | TTTTTATGGCGGGAAGTAGACTG  |
| <i>Hdac1</i>                      | GTGCCTGCTTAGGAGCTCTG        | CCTCCACCCTACAGAATTGG     |
| ChIP primers                      | Forward                     | Reverse                  |
| <i>Pard6b</i>                     | GGGCACTCAGCATGAACC          | GCCACTCTGCGTCCTCAC       |
| <i>Cldn4</i>                      | GGCTGGGGGAGATGATAGTT        | CCACAGGTGCTGCAGTTAAA     |
| <i>Tjp2</i>                       | ATAGGCACTTGTCCCCCTTT        | CAGGTA CTGCTGGAGAAG      |
| <i>Aqp3</i>                       | GTGCCTTGCCTAGCTACTT         | GTGAAGCATCTCCCCACAAC     |
| <i>Krt18</i>                      | GTGAGGATGGCAGGTATGCT        | GCGAGAGACCAGAACAGGAG     |
| <i>p21</i>                        | TGTCTGGATATCGCTGTGGA        | AAGGAGTGGGTTGGTCCTG      |
| Intergenic<br>negative<br>control | TTTTTCAGTTCACACATATAAAGCAGA | TGTTGTTGTTGTTGCTTCACTG   |

**[Table S2. Putative Tcfap2c target genes](#)**

**Table S3. Enriched GO terms and biological processes of putative Tcfap2c target genes in blastocysts**

| GO term    | Description                                   | P-value  | Enrichment |
|------------|-----------------------------------------------|----------|------------|
| GO:0060644 | Mammary gland epithelial cell differentiation | 1.65E-04 | 101.86     |
| GO:0071345 | Cellular response to cytokine stimulus        | 2.37E-04 | 10.8       |
| GO:0019221 | Cytokine-mediated signaling pathway           | 8.53E-04 | 11.88      |

**Table S4. Pathway analysis of genes bound by Tcfap2c and upregulated at the blastocyst stage**

| Pathway                                     | Gene counts | P-value     |
|---------------------------------------------|-------------|-------------|
| Tight junction                              | 24          | 4.83E-07    |
| Regulation of actin cytoskeleton            | 26          | 1.68E-04    |
| Focal adhesion                              | 24          | 4.04E-04    |
| Amino sugar and nucleotide sugar metabolism | 9           | 0.002641929 |
| Adherens junction                           | 12          | 0.002738967 |
| Pathways in cancer                          | 30          | 0.006226075 |

**Table S5. Tcfap2c target genes with known functions/phenotypes**

| Gene              | Type of protein                                                              | Function/phenotype                                                                                                                                                  | Manipulations/methods                                       | References                                                            |
|-------------------|------------------------------------------------------------------------------|---------------------------------------------------------------------------------------------------------------------------------------------------------------------|-------------------------------------------------------------|-----------------------------------------------------------------------|
| <i>Pard6b</i>     | Regulation of junction assembly and polarization/cytoplasmic adaptor protein | Embryos failed to form blastocyst cavity; abnormal Tjp1 localization; Prkcz absent                                                                                  | shRNA plasmid injection                                     | (Alarcon, 2010)                                                       |
| <i>Cldn4</i>      | Tight junction-associated transmembrane protein                              | Absent or immature blastocoel cavity without expansion                                                                                                              | Specific inhibitor treatment                                | (Moriwaki et al., 2007)                                               |
| <i>Cldn6</i>      | Tight junction-associated transmembrane protein                              | Absent or immature blastocoel cavity without expansion                                                                                                              | Specific inhibitor treatment                                | (Moriwaki et al., 2007)                                               |
| <i>Cldn7</i>      | Tight junction-associated transmembrane protein                              | Expressed during preimplantation development; function in preimplantation development?                                                                              | RT-PCR                                                      | (Moriwaki et al., 2007)                                               |
| <i>Tjp1</i>       | Cytoplasmic adaptor protein/regulation of junction assembly                  | KO embryos failed to develop beyond E11.5; KD embryos exhibited a decrease in blastocyst formation                                                                  | Knockout, siRNA microinjection                              | (Katsuno et al., 2008; Sheth et al., 2008)                            |
| <i>Tjp2</i>       | Cytoplasmic adaptor protein/regulation of junction assembly                  | KO embryos die around gastrulation; KD embryos showed delayed blastocoel formation and upregulation of Tjp1                                                         | Knockout, siRNA microinjection                              | (Katsuno et al., 2008; Sheth et al., 2008; Xu et al., 2008)           |
| <i>Atp1b1</i>     | Ion gradient                                                                 | KD embryos fail to develop to the blastocyst stage; abnormal distribution of Ocln and Tjp1                                                                          | siRNA injection                                             | (Madan et al., 2007)                                                  |
| <i>Atp1b3</i>     | Ion gradient                                                                 | A gene preferentially expressed in human TE and associated with blastocyst formation in bovine                                                                      | Human microarray data; a subtractive cDNA library in bovine | (Adjaye et al., 2005; Goossens et al., 2007)                          |
| <i>Atp1a1</i>     | Ion gradient                                                                 | KO embryos underwent compaction and cavitation, but showed aberrant blastocyst formation such as cell dissociation in vitro and peri-implantation lethality in vivo | Knockout                                                    | (Barcroft et al., 2004)                                               |
| <i>Aqp3</i>       | Water channel protein                                                        | Aqp3 is localized on the basolateral membrane domain of the TE; mediates trans-trophectodermal water movement during cavitation                                     | Hyperosmotic treatment                                      | (Barcroft et al., 2003)                                               |
| <i>Aqp9</i>       | Water channel protein                                                        | Aqp9 is localized at the apical membrane of the TE; mediates trans-trophectodermal water movement during cavitation                                                 | Hyperosmotic treatment                                      | (Barcroft et al., 2003)                                               |
| <i>Cdh1</i>       | Adhesion                                                                     | KO of zygotic Cdh1 results in failure to cavitate after compaction; maternal KO showed delayed compaction but normal development by zygotic expression              | Knockout                                                    | (Larue et al., 1994; Riethmacher et al., 1995; de Vries et al., 2004) |
| <i>Ocln</i>       | Tight junction-associated transmembrane protein                              | Inhibition of blastocoel formation and impaired paracellular sealing of TE; Occludin-/- mice born with no gross phenotype in the expected Mendelian ratios          | Neutralizing antibodies                                     | (Saitou et al., 2000; Kim et al., 2004)                               |
| <i>Inadl/Patj</i> | Regulation of junction assembly and polarization/cytoplasmic adaptor protein | Disruption of Patj expression in mice leads to delayed tight junction formation as well as defects in cell polarization                                             | siRNA transfection                                          | (Shin et al., 2005)                                                   |
| <i>Jam2</i>       | Tight junction-associated transmembrane protein                              | Jam2 interacts with Tjp1 and Par3 in endothelia cells; role in blastocyst formation?                                                                                | In vitro GST-pulldown assay                                 | (Ebnet et al., 2003)                                                  |
| <i>F11r/Jam1</i>  | Tight junction-associated transmembrane protein                              | Compacted embryo treated with neutralizing antibodies showed delayed blastocoel cavity formation                                                                    | Neutralizing antibodies                                     | (Thomas et al., 2004)                                                 |
| <i>Fnl1</i>       | Tight junction-associated protein                                            | Expression is upregulated during blastocyst formation in bovine; role in preimplantation development?                                                               | A subtractive cDNA library in bovine                        | (Goossens et al., 2007)                                               |
| <i>Rock2</i>      | Downstream effector of small GTPase                                          | Mouse embryos treated with an inhibitor developed to the morula stage, but fail to form blastocysts                                                                 | Specific inhibitor of Rho-kinase treatment                  | (Kawagishi et al., 2004)                                              |
| <i>Krt18</i>      | Cytoskeleton, intermediate filament                                          | KD bovine embryos exhibit a decrease in blastocyst formation                                                                                                        | dsRNA injection                                             | (Goossens et al., 2007)                                               |
